# Supplementary material for: Effects of jasmonic acid in foliar spray and an humic acid amendment to saline soils on forage sorghum plants’ growth and antioxidant defense system
Source: PeerJ. 2022 Oct 14;10:e13793. doi: 10.7717/peerj.13793 (PMC9575685; doi:10.7717/peerj.13793)
Supplement: Supplemental Information 1 [file peerj-10-13793-s001.xlsx]

## Sheet: Parameters 1
				All Antioxidants Parameters and Chlorphyll content and Carotains content
				The interaction between salinity and hmic acid and jasmonic acid
		Number	Replication	Parameters
				Protien	Proline	SOD	POD	CAT	MDA	APX	Chlor A	Chlor b	Carotaine
		1	1	111.387	17.0503	13.9575	66.7186	19.134	4.08569	57.8453	1.42781	1.01788	0.761575
		2	1	113.988	31.1792	19.3959	82.4298	27.6782	9.433	91.8215	1.91388	1.3296	1.0058
		3	1	121.196	26.7395	17.9476	59.4496	18.0706	7.14407	85.5157	1.49854	1.85781	0.975052
		4	1	110.217	28.2078	17.279	71.38	19.7908	7.89499	43.2973	1.67226	0.812618	0.929689
		5	1	115.039	40.3354	14.6606	56.985	45.4039	7.53059	129.681	1.57146	1.60985	0.927994
		6	1	113.468	32.2345	20.0754	63.5289	23.2002	7.00631	81.3039	1.6641	1.28574	1.32143
		7	1	117.481	20.7778	19.8435	57.7329	20.7353	7.26421	72.605	1.50122	1.07949	1.06231
		8	1	112.153	28.5361	16.41	45.2139	24.3784	4.8557	75.3085	1.85961	1.48608	1.27649
		9	1	108.48	33.6676	13.9813	56.7841	30.71	5.23681	94.5046	1.42142	1.54707	1.47382
		10	1	114.204	19.9943	16.6754	51.0054	25.7231	5.49887	53.5288	1.51571	0.951513	1.14475
		11	1	111.41	26.6627	16.5434	49.3471	22.3452	5.95096	85.9522	1.83369	1.39651	1.56052
		12	1	118.548	27.0755	17.1351	47.0306	25.7825	6.17826	112.144	2.02042	2.05801	0.89182
		13	1	113.933	20.7152	20.88	65.5859	19.7991	7.54896	65.2861	1.92192	1.61773	0.799207
		14	1	120.975	26.1858	21.6713	80.4565	25.8308	8.45896	89.4062	1.63197	1.94582	0.750013
		15	1	108.363	40.1328	17.6804	48.6701	40.0399	7.17164	100.378	1.99879	1.90271	1.65956
		16	1	122.715	30.0852	15.156	54.4498	15.4043	6.18269	34.3317	2.0119	1.61612	1.25375
		17	1	123.447	27.3752	18.2205	62.747	22.9726	7.58295	48.2674	2.14578	1.82448	1.13798
		18	1	109.467	33.7151	19.6657	51.5	19.963	6.04129	45.6781	1.84665	1.39639	1.21386
		19	1	112.407	19.343	17.4059	30.005	24.2477	4.88316	48.199	1.1953	0.709916	0.995434
		20	1	116.207	23.9424	16.9305	35.435	25.3593	6.93198	49.6098	1.44188	0.655504	1.03825
		21	1	109.443	28.8414	17.4672	43.3761	20.3	10.0372	52.9083	1.41454	0.822088	1.02433
		22	1	115.25	12.6438	16.9484	35.9415	19.5036	7.77006	18.204	1.31809	0.452848	0.716302
		23	1	125.781	23.8123	15.9618	32.5651	23.975	10.6911	59.0561	2.45434	1.21367	3.44637
		24	1	130.005	16.2383	14.1014	34.123	29.5503	18.795	78.1415	1.81485	1.15034	1.02545
		25	1	118.55	29.6172	18.1639	30.0127	23.0885	4.60932	37.261	1.59792	0.500705	0.90548
		26	1	122.588	35.3922	12.3408	58.6904	24.4336	6.74277	35.4204	1.95055	1.0724	2.19505
		27	1	107.247	44.5985	17.1015	69.4092	27.8311	5.21751	26.8986	1.59219	0.845312	1.50022
		28	2	99.7548	24.2232	18.3481	80.3656	19.155	5.87171	48.8407	1.71695	1.2394	1.08438
		29	2	112.275	32.1509	16.0709	83.7675	27.0777	10.1136	100.248	1.8887	1.50157	1.11818
		30	2	114.776	27.5431	21.6502	66.7805	18.4199	7.40929	51.7178	1.72688	1.54699	1.2964
		31	2	116.446	28.5535	20.3333	68.669	18.5236	6.26198	32.9062	1.66166	1.24915	1.09141
		32	2	117.461	42.2677	16.2195	67.7724	37.5112	6.03835	109.754	1.89363	1.81944	1.01641
		33	2	106.092	30.0418	19.8447	62.7663	26.1007	5.69517	87.2888	1.226	1.07645	1.30456
		34	2	112.195	36.2946	18.3618	44.354	18.0856	6.14849	78.2908	1.88113	1.41692	1.15849
		35	2	103.803	107.877	17.1348	78.3818	21.9412	4.28103	58.5546	1.33678	1.29681	1.59213
		36	2	116.869	34.4821	15.8327	39.2982	28.9137	5.65356	87.5021	1.59047	1.4406	1.31981
		37	2	102.783	19.1944	16.341	51.8122	25.5527	5.40755	37.4011	1.25956	1.26174	0.706554
		38	2	105.602	26.6823	13.2702	40.0727	28.8624	4.02972	76.9411	1.32578	0.669259	1.47877
		39	2	111.098	23.308	14.2939	43.6345	26.2064	4.96162	94.8131	1.75634	1.65611	1.39062
		40	2	118.039	27.7304	15.8908	43.9893	20.459	6.53639	46.548	2.21711	1.54135	0.695387
		41	2	135.613	25.1308	16.0486	49.0304	26.0644	6.85108	69.9881	1.97293	1.56188	1.18549
		42	2	115.468	39.9667	16.9237	47.1313	24.2385	6.78846	90.7353	1.93767	1.82492	1.27945
		43	2	117.364	30.255	17.4796	39.816	18.2086	4.78167	36.3745	1.81011	0.862182	1.04545
		44	2	120.445	30.5583	18.0379	39.2156	26.865	8.61232	52.2828	1.38991	1.41404	1.26742
		45	2	119.315	32.1781	17.101	47.6327	18.7	7.68229	52.6255	1.70243	1.1129	1.13066
		46	2	125.126	16.791	16.6906	30.2809	24.829	5.73921	32.1497	0.971016	0.736182	0.96997
		47	2	107.505	23.8268	17.7739	40.8266	26.0315	7.34233	51.3345	1.72355	0.926819	0.821993
		48	2	116.962	25.3196	15.2443	39.84	18.2366	7.39822	34.0564	1.69206	1.20317	1.21142
		49	2	115.029	17.0123	20.1119	39.0362	18.8627	6.53473	23.0439	1.48496	0.380923	0.703323
		50	2	151.704	28.6539	15.3299	35.73	22.6864	11.0723	29.7439	2.05563	1.1413	3.40023
		51	2	169.625	17.3973	16.9482	36.2257	27.7344	17.8882	31.317	1.61088	1.02075	1.04166
		52	2	113.584	25.9546	16.8278	35.7146	22.8498	4.05948	29.4292	1.47955	0.573044	0.772686
		53	2	125.539	34.0485	11.8186	36.707	27.2247	5.92139	55.844	1.47658	1.1918	1.45842
		54	2	114.222	39.7654	16.8582	46.292	32.6044	5.19438	22.8474	1.31803	1.03173	1.04598
		55	3	112.716	21.6745	16.2304	77.9753	17.5081	5.36693	56.0206	1.59577	1.0792	0.96067
		56	3	114.234	28.1981	16.3285	79.6332	27.8253	6.91511	69.3642	1.9052	1.49784	1.16475
		57	3	124.2	27.1504	20.3986	62.7646	18.3612	5.73045	46.2454	1.77269	1.45018	1.02194
		58	3	109.011	28.3807	15.6975	84.3493	17.5296	5.77187	40.2084	1.66492	1.26716	0.936634
		59	3	119.519	41.3016	15.171	59.9128	36.8681	8.04657	115.541	1.76016	1.71891	0.744875
		60	3	114.564	31.1381	19.5049	65.4879	24.9804	5.70226	97.6212	1.44547	0.95941	1.01521
		61	3	104.791	27.4984	20.5474	58.863	17.8079	5.69417	69.0745	1.69236	1.4958	0.850582
		62	3	117.564	66.6736	16.8446	58.9884	28.2237	3.9365	68.9928	1.60776	1.20041	1.48877
		63	3	113.956	34.0658	14.9836	61.1345	32.4188	4.53136	73.3518	1.52932	1.67724	1.11647
		64	3	102.6	19.5943	16.0818	55.4144	25.9462	5.56959	39.1077	1.39466	1.11399	1.04267
		65	3	115.096	26.6725	14.8331	60.271	26.9339	5.05803	79.6317	1.56127	1.03005	1.07101
		66	3	111.2	25.1917	15.8869	49.6361	25.4622	5.04695	105.172	2.05632	1.80756	1.20623
		67	3	129.133	24.2228	17.4142	64.1097	22.0826	13.225	53.7953	2.06271	1.59211	0.737651
		68	3	118.197	27.0668	18.4915	79.605	33.6937	7.16028	69.5881	1.89101	2.01681	1.03891
		69	3	112.041	37.9628	17.4402	65.9087	28.3301	6.35006	89.5113	1.96733	1.7146	1.48755
		70	3	111.001	29.774	23.7304	50.0203	17.8589	6.58176	58.8673	1.90523	1.16751	1.1588
		71	3	124.15	27.3427	17.3052	49.9994	40.5478	5.86481	54.3645	1.86858	0.990779	1.35832
		72	3	122.5	33.0006	21.4784	60.1585	21.1409	7.07164	48.9845	1.81728	1.16418	1.02797
		73	3	117.89	18.067	16.9726	30.751	22.7983	4.8001	43.3248	1.0622	0.699669	0.98995
		74	3	119.538	21.3846	17.3254	38.346	25.3099	5.7426	45.4966	1.61732	0.751395	0.97608
		75	3	124.251	27.0805	16.4178	42.4591	20.5758	8.5341	29.1026	1.54134	0.987005	1.11046
		76	3	114.993	14.7408	18.771	37.9262	18.5264	7.02509	34.1608	1.37372	0.998532	0.70528
		77	3	142.3	25.8992	15.7039	37.68	23.1229	10.2896	152.186	2.3574	1.15406	3.42788
		78	3	128.964	17.4225	15.7635	34.691	25.8398	13.445	44.0254	1.78539	0.922533	0.978516
		79	3	141.026	27.3732	17.7421	33.3809	25.3795	4.94831	48.8681	1.52985	0.52313	0.754772
		80	3	121.623	33.8657	12.724	50.9037	25.4577	5.55841	44.1034	1.67896	1.16186	1.85994
		81	3	127.575	42.5159	17.158	42.8102	29.8272	5.15772	26.515	1.45502	0.741751	0.946294
				Salinity three levels
				Humic acid three rates
				Jasmonic acid Also three levels

## Sheet: Parameters 2
						The interaction between salinity and hmic acid and jasmonic acid
						Number	Growth Parameters
							Plant Height	Relative Growth Rate	Leave area
						1	212.281	4.35215	261.622
						2	241.001	5.97654	306.951
						3	227.897	4.86639	322.006
						4	234.64	5.66728	208.735
						5	272.719	5.62746	333.58
						6	258.408	5.29048	395.435
						7	278.308	5.91341	250.483
						8	273.785	5.93431	291.28
						9	285.097	5.87821	274.589
						10	235.464	4.45606	290.935
						11	250.786	4.6569	316.118
						12	257.189	4.98822	396.664
						13	227.758	4.42045	262.825
						14	236.594	4.46659	281.783
						15	234.575	4.46201	362.937
						16	187.697	3.66273	271.395
						17	183.458	2.59764	306.142
						18	194.23	3.09123	270.958
						19	208.85	3.22566	250.797
						20	200.95	2.87455	377.638
						21	203.125	2.38432	275.783
						22	179.803	2.63497	224.524
						23	208.342	2.74349	406.526
						24	186.083	2.75275	249.205
						25	147.144	2.40689	169.813
						26	158.281	2.61017	208.574
						27	170.945	2.21282	250.034
						28	221.097	4.12112	304.22
						29	233.07	4.60304	348.128
						30	215.372	3.83343	378.401
						31	232.942	3.72538	242.694
						32	283.306	4.62556	406.909
						33	258.155	4.85946	355.36
						34	273.77	3.965	281.292
						35	258.408	3.73786	309.12
						36	286.8	5.47403	296.681
						37	257.025	4.52589	279.567
						38	262.98	4.10107	311.318
						39	258.086	4.19337	342.666
						40	235.697	3.31082	287.588
						41	222.011	3.5753	291.035
						42	244.753	3.93225	364.177
						43	219.383	3.08473	282.695
						44	198.097	2.6292	316.191
						45	187.15	2.44059	288.741
						46	214.397	3.44182	284.793
						47	213.955	2.74461	340.183
						48	220.606	2.68355	315.919
						49	175.035	2.82868	201.966
						50	196.669	3.15268	302.233
						51	205.969	3.42173	251.378
						52	150.192	2.36277	165.194
						53	168.289	2.71205	177.074
						54	170.197	2.29073	250.956
						55	216.314	4.21959	282.738
						56	236.033	5.27165	327.539
						57	220.037	4.20641	348.953
						58	218.167	3.99511	225.715
						59	285.728	5.91051	370.244
						60	253.531	4.91972	375.397
						61	275.814	4.89114	265.888
						62	287.958	5.78889	300.2
						63	283.361	5.54487	285.635
						64	240.794	4.21505	260.251
						65	276.742	5.27309	313.718
						66	262.325	4.86897	369.665
						67	233.278	4.04589	275.206
						68	230.753	4.10065	286.409
						69	241.614	4.20061	358.557
						70	205.303	3.46994	277.045
						71	190.453	2.66705	311.167
						72	202.461	3.26545	279.85
						73	212.561	3.29155	267.795
						74	214.464	3.10982	333.91
						75	211.903	2.51234	300.852
						76	172.369	2.51045	213.245
						77	207.381	3.09958	349.379
						78	198.489	3.12337	250.291
						79	149.731	2.37283	175.008
						80	163.325	2.69553	185.324
						81	173.197	2.28305	250.495
							Salinity three levels
							Humic acid three rates
							Jasmonic acid Also three levels

## Sheet: Standard Deviation 1
						Standard Deviation of the Interaction Between Jasmonic acid and Humic acid of the Antioxidants Parameters
						Protien		SOD		POD		CAT		Total Chlor		Carotaine
						111.387	110.985	13.9575	16.5226	66.7186	52.7032	19.134	22.766	2.4457	2.32761	0.761575	0.961772
						114.204	8.11556	16.6754	1.18634	51.0054	19.7206	25.7231	3.29683	2.46722	0.433459	1.14475	0.14242
						112.407		17.4059		30.005		24.2477		1.90522		0.995434
						99.7548		18.3481		80.3656		19.155		2.95635		1.08438
						102.783		16.341		51.8122		25.5527		2.52131		0.706554
						125.126		16.6906		30.2809		24.829		1.7072		0.96997
						112.716		16.2304		77.9753		17.5081		2.67497		0.96067
						102.6		16.0818		55.4144		25.9462		2.50865		1.04267
						117.89		16.9726		30.751		22.7983		1.76187		0.98995
						113.988	112.873	19.3959	16.4969	82.4298	56.681	27.6782	26.3804	3.24348	2.77442	1.0058	1.13726
						111.41	4.29774	16.5434	1.74288	49.3471	20.3252	22.3452	1.91434	3.2302	0.556947	1.56052	0.238156
						116.207		16.9305		35.435		25.3593		2.09738		1.03825
						112.275		16.0709		83.7675		27.0777		3.39027		1.11818
						105.602		13.2702		40.0727		28.8624		1.99504		1.47877
						107.505		17.7739		40.8266		26.0315		2.65037		0.821993
						114.234		16.3285		79.6332		27.8253		3.40303		1.16475
						115.096		14.8331		60.271		26.9339		2.59132		1.07101
						119.538		17.3254		38.346		25.3099		2.36872		0.97608
						121.196	116.853	17.9476	17.3824	59.4496	50.5523	18.0706	21.2683	3.35635	3.20756	0.975052	1.12536
						118.548	5.64305	17.1351	2.3711	47.0306	9.9027	25.7825	3.53113	4.07844	0.587318	0.89182	0.162721
						109.443		17.4672		43.3761		20.3		2.23663		1.02433
						114.776		21.6502		66.7805		18.4199		3.27387		1.2964
						111.098		14.2939		43.6345		26.2064		3.41245		1.39062
						116.962		15.2443		39.84		18.2366		2.89522		1.21142
						124.2		20.3986		62.7646		18.3612		3.22286		1.02194
						111.2		15.8869		49.6361		25.4622		3.86389		1.20623
						124.251		16.4178		42.4591		20.5758		2.52834		1.11046
						110.217	115.783	17.279	18.1474	71.38	56.7764	19.7908	19.453	2.48488	2.80997	0.929689	0.812764
						113.933	5.76083	20.88	1.94669	65.5859	17.7271	19.7991	1.31974	3.53965	0.744906	0.799207	0.141021
						115.25		16.9484		35.9415		19.5036		1.77094		0.716302
						116.446		20.3333		68.669		18.5236		2.91081		1.09141
						118.039		15.8908		43.9893		20.459		3.75846		0.695387
						115.029		20.1119		39.0362		18.8627		1.86588		0.703323
						109.011		15.6975		84.3493		17.5296		2.93209		0.936634
						129.133		17.4142		64.1097		22.0826		3.65482		0.737651
						114.993		18.771		37.9262		18.5264		2.37225		0.70528
						115.039	127.399	14.6606	16.5842	56.985	55.5264	45.4039	30.5729	3.18131	3.53003	0.927994	1.77091
						120.975	12.8571	21.6713	2.19001	80.4565	18.2086	25.8308	8.074	3.57779	0.232668	0.750013	1.24803
						125.781		15.9618		32.5651		23.975		3.66801		3.44637
						117.461		16.2195		67.7724		37.5112		3.71308		1.01641
						135.613		16.0486		49.0304		26.0644		3.53481		1.18549
						151.704		15.3299		35.73		22.6864		3.19693		3.40023
						119.519		15.171		59.9128		36.8681		3.47907		0.744875
						118.197		18.4915		79.605		33.6937		3.90782		1.03891
						142.3		15.7039		37.68		23.1229		3.51146		3.42788
						113.468	122.066	20.0754	17.5869	63.5289	50.9481	23.2002	27.7794	2.94984	3.03421	1.32143	1.23482
						108.363	19.6522	17.6804	1.97864	48.6701	13.7707	40.0399	5.02097	3.9015	0.644339	1.65956	0.238143
						130.005		14.1014		34.123		29.5503		2.96519		1.02545
						106.092		19.8447		62.7663		26.1007		2.30245		1.30456
						115.468		16.9237		47.1313		24.2385		3.76258		1.27945
						169.625		16.9482		36.2257		27.7344		2.63163		1.04166
						114.564		19.5049		65.4879		24.9804		2.40488		1.01521
						112.041		17.4402		65.9087		28.3301		3.68193		1.48755
						128.964		15.7635		34.691		25.8398		2.70792		0.978516
						117.481	117.634	19.8435	18.6503	57.7329	44.9271	20.7353	19.9354	2.58072	2.73824	1.06231	0.995813
						122.715	10.1788	15.156	2.47176	54.4498	10.8507	15.4043	3.24975	3.62802	0.591331	1.25375	0.181515
						118.55		18.1639		30.0127		23.0885		2.09863		0.90548
						112.195		18.3618		44.354		18.0856		3.29805		1.15849
						117.364		17.4796		39.816		18.2086		2.67229		1.04545
						113.584		16.8278		35.7146		22.8498		2.05259		0.772686
						104.791		20.5474		58.863		17.8079		3.18816		0.850582
						111.001		23.7304		50.0203		17.8589		3.07274		1.1588
						141.026		17.7421		33.3809		25.3795		2.05298		0.754772
						112.153	119.035	16.41	15.6485	45.2139	53.4275	24.3784	26.8939	3.34569	2.9948	1.27649	1.51495
						123.447	6.98898	18.2205	2.58483	62.747	12.9196	22.9726	5.50746	3.97026	0.422162	1.13798	0.330939
						122.588		12.3408		58.6904		24.4336		3.02295		2.19505
						103.803		17.1348		78.3818		21.9412		2.63359		1.59213
						120.445		18.0379		39.2156		26.865		2.80395		1.26742
						125.539		11.8186		36.707		27.2247		2.66839		1.45842
						117.564		16.8446		58.9884		28.2237		2.80817		1.48877
						124.15		17.3052		49.9994		40.5478		2.85936		1.35832
						121.623		12.724		50.9037		25.4577		2.84081		1.85994
						108.48	115.514	13.9813	17.129	56.7841	52.7799	30.71	26.901	2.96849	2.80333	1.47382	1.19723
						109.467	6.79184	19.6657	2.28087	51.5	9.79915	19.963	5.4719	3.24303	0.383147	1.21386	0.196551
						107.247		17.1015		69.4092		27.8311		2.43751		1.50022
						116.869		15.8327		39.2982		28.9137		3.03108		1.31981
						119.315		17.101		47.6327		18.7		2.81533		1.13066
						114.222		16.8582		46.292		32.6044		2.34976		1.04598
						113.956		14.9836		61.1345		32.4188		3.20656		1.11647
						122.5		21.4784		60.1585		21.1409		2.98146		1.02797
						127.575		17.158		42.8102		29.8272		2.19677		0.946294
						Humic acid three rates
						Jasmonic acid Also three levels

## Sheet: Standard Deviation 2
						Standard Deviation of the Interaction Between Jasmonic acid and Humic acid On Realative Growth rate and Leave area
						Plant Height		Relative Growth Rate		Leave area
						212.281	240.37	4.35215	4.53891	261.622	258.154
						234.64	27.6842	5.66728	0.781414	208.735	29.8455
						278.308		5.91341		250.483
						221.097		4.12112		304.22
						232.942		3.72538		242.694
						273.77		3.965		281.292
						216.314		4.21959		282.738
						218.167		3.99511		225.715
						275.814		4.89114		265.888
						241.001	263.557	5.97654	5.27509	306.951	332.661
						272.719	22.045	5.62746	0.787015	333.58	37.3713
						273.785		5.93431		291.28
						233.07		4.60304		348.128
						283.306		4.62556		406.909
						258.408		3.73786		309.12
						236.033		5.27165		327.539
						285.728		5.91051		370.244
						287.958		5.78889		300.2
						227.897	254.295	4.86639	4.98589	322.006	336.939
						258.408	27.9911	5.29048	0.652891	395.435	43.97
						285.097		5.87821		274.589
						215.372		3.83343		378.401
						258.155		4.85946		355.36
						286.8		5.47403		296.681
						220.037		4.20641		348.953
						253.531		4.91972		375.397
						283.361		5.54487		285.635
						235.464	226.933	4.45606	3.91017	290.935	276.39
						227.758	20.471	4.42045	0.541348	262.825	10.3565
						187.697		3.66273		271.395
						257.025		4.52589		279.567
						235.697		3.31082		287.588
						219.383		3.08473		282.695
						240.794		4.21505		260.251
						233.278		4.04589		275.206
						205.303		3.46994		277.045
						250.786	227.986	4.6569	3.78528	316.118	303.765
						236.594	32.6416	4.46659	0.979683	281.783	13.5557
						183.458		2.59764		306.142
						262.98		4.10107		311.318
						222.011		3.5753		291.035
						198.097		2.6292		316.191
						276.742		5.27309		313.718
						230.753		4.10065		286.409
						190.453		2.66705		311.167
						257.189	231.376	4.98822	3.93808	396.664	337.135
						234.575	29.162	4.46201	0.850738	362.937	45.4028
						194.23		3.09123		270.958
						258.086		4.19337		342.666
						244.753		3.93225		364.177
						187.15		2.44059		288.741
						262.325		4.86897		369.665
						241.614		4.20061		358.557
						202.461		3.26545		279.85
						208.85	178.898	3.22566	2.78618	250.797	217.015
						179.803	27.459	2.63497	0.429112	224.524	43.7163
						147.144		2.40689		169.813
						214.397		3.44182		284.793
						175.035		2.82868		201.966
						150.192		2.36277		165.194
						212.561		3.29155		267.795
						172.369		2.51045		213.245
						149.731		2.37283		175.008
						200.95	192.406	2.87455	2.86027	377.638	297.871
						208.342	22.6719	2.74349	0.207342	406.526	85.9961
						158.281		2.61017		208.574
						213.955		2.74461		340.183
						196.669		3.15268		302.233
						168.289		2.71205		177.074
						214.464		3.10982		333.91
						207.381		3.09958		349.379
						163.325		2.69553		185.324
						203.125	193.39	2.38432	2.62941	275.783	266.101
						186.083	18.925	2.75275	0.414111	249.205	25.6574
						170.945		2.21282		250.034
						220.606		2.68355		315.919
						205.969		3.42173		251.378
						170.197		2.29073		250.956
						211.903		2.51234		300.852
						198.489		3.12337		250.291
						173.197		2.28305		250.495
						Humic acid three rates
						Jasmonic acid Also three levels

## Sheet: Standard Deviation 3
				Standard Deviation of the Interaction Between Salinity and Humic acid of Relatuve Growth Rate and APX
				Relative Growth Rate		APX
				4.35215	3.98321	57.8453	46.2686
				4.45606	0.515779	53.5288	8.87479
				3.22566		48.199
				4.12112		48.8407
				4.52589		37.4011
				3.44182		32.1497
				4.21959		56.0206
				4.21505		39.1077
				3.29155		43.3248
				5.97654	4.29014	91.8215	72.2667
				4.6569	1.16337	85.9522	19.7019
				2.87455		49.6098
				4.60304		100.248
				4.10107		76.9411
				2.74461		51.3345
				5.27165		69.3642
				5.27309		79.6317
				3.10982		45.4966
				4.86639	3.83744	85.5157	67.9639
				4.98822	1.05528	112.144	31.5981
				2.38432		52.9083
				3.83343		51.7178
				4.19337		94.8131
				2.68355		34.0564
				4.20641		46.2454
				4.86897		105.172
				2.51234		29.1026
				5.66728	3.68211	43.2973	39.7167
				4.42045	1.00335	65.2861	14.7044
				2.63497		18.204
				3.72538		32.9062
				3.31082		46.548
				2.82868		23.0439
				3.99511		40.2084
				4.04589		53.7953
				2.51045		34.1608
				5.62746	4.14465	129.681	91.6605
				4.46659	1.11901	89.4062	38.5117
				2.74349		59.0561
				4.62556		109.754
				3.5753		69.9881
				3.15268		29.7439
				5.91051		115.541
				4.10065		69.5881
				3.09958		152.186
				5.29048	4.10693	81.3039	77.8136
				4.46201	0.870616	100.378	24.0077
				2.75275		78.1415
				4.85946		87.2888
				3.93225		90.7353
				3.42173		31.317
				4.91972		97.6212
				4.20061		89.5113
				3.12337		44.0254
				5.91341	3.56994	72.605	51.678
				3.66273	1.21915	34.3317	18.5282
				2.40689		37.261
				3.965		78.2908
				3.08473		36.3745
				2.36277		29.4292
				4.89114		69.0745
				3.46994		58.8673
				2.37283		48.8681
				5.93431	3.48585	75.3085	54.7932
				2.59764	1.394	48.2674	12.1264
				2.61017		35.4204
				3.73786		58.5546
				2.6292		52.2828
				2.71205		55.844
				5.78889		68.9928
				2.66705		54.3645
				2.69553		44.1034
				5.87821	3.609	94.5046	53.2119
				3.09123	1.56412	45.6781	23.2084
				2.21282		26.8986
				5.47403		87.5021
				2.44059		52.6255
				2.29073		22.8474
				5.54487		73.3518
				3.26545		48.9845
				2.28305		26.515
				Salinity three levels
				Humic acid three rates
